# Supplementary material for: Evaluation of Anti-Hyperglycemia and Complications of Red and Black Thai Jasmine Rice Cultivars in Streptozotocin-Induced Diabetic Rats
Source: MDPI journal article supplement (doi:10.3390/molecules27228043), 2022-11-19
Supplement: s1 [file s1]

## **Materials and methods (Supplementary Materials)**

### **1.1 Quantitative analysis of RR and BR extracts**

#### **1.1.1 Phenolic compound analysis**

HPLC separation was performed on a LiChroCART RP-18e column [150 x 4.6 mm, diameter 5  $\mu$ m] (Purospher STAR Merck USA). The mobile phase consisted of 10 mM ammonium formate buffer, pH 4 with formic acid (mobile phase A) and 10 mM ammonium formate buffer, pH 4 with formic acid in acetonitrile (mobile phase B). The gradient used was 100% of solvent B from 0 - 5 min, 0% to 20% of solvent A from 5 - 10 min, 20% of solvent A from 10-20 min, and 20% to 40% of solvent A from 20-60 min, at flow rate of 1.0 mL/min and the injection volume was 10  $\mu$ L. The separated compounds, acquired with a diode array at wavelengths of 270 nm, were assessed and compared to a standard calibration curve.

#### **1.1.2 Anthocyanin analysis**

HPLC separation was performed on a Zorbax SB C18 column [150 x 4.6 mm, diameter 5  $\mu$ m] (Agilent technologies USA). The mobile phase was composed of 0.1% trifluoroacetic acid (TFA) in water (mobile phase A) and 0.1% TFA in acetonitrile (mobile phase B). The gradient used was 7% to 20% of solvent A in 60 min, then 93% to 80% of solvent B in 60 min at flow rate of 0.5 mL/min and the injection volume was 10  $\mu$ L. Separated compounds, acquired with a diode array at wavelengths of 270 and 500 nm, were interpreted and quantified using a standard calibration curve.

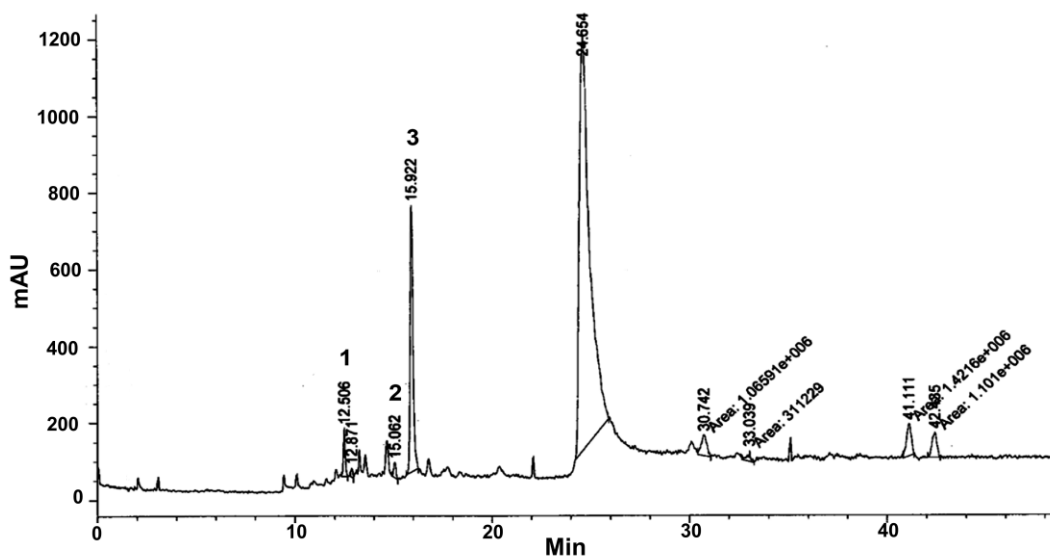

**Figure S1** High performance liquid chromatography (HPLC) chromatogram of a mixture of phenolic acid standards. Peak: 1 Catechin, 2 Rutin, and 3 Isoquercetin.

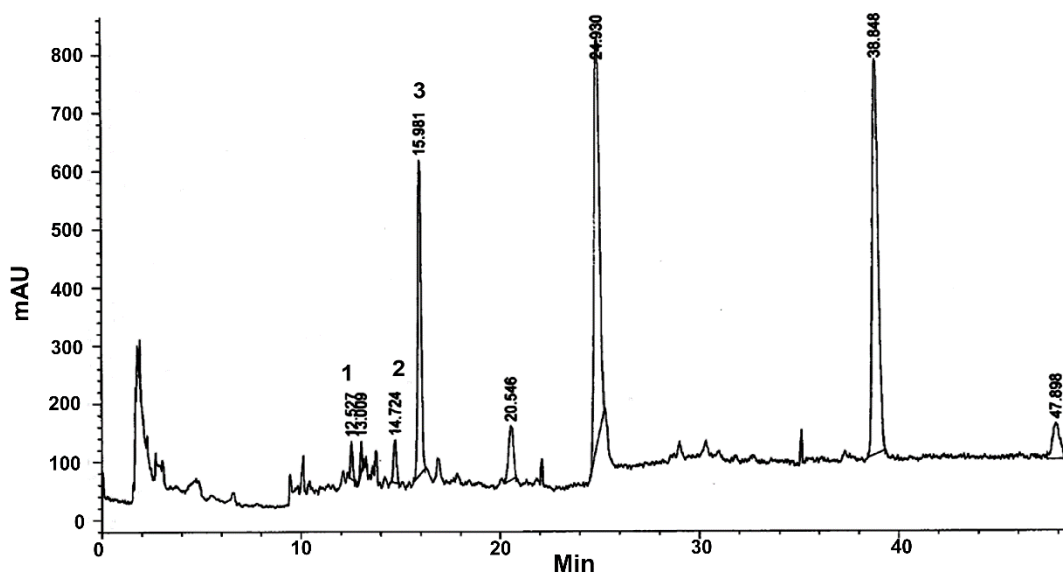

**Figure S2** HPLC chromatogram of polyphenols from red rice extract. Peak: 1 Catechin, 2 Rutin, and 3 Isoquercetin.

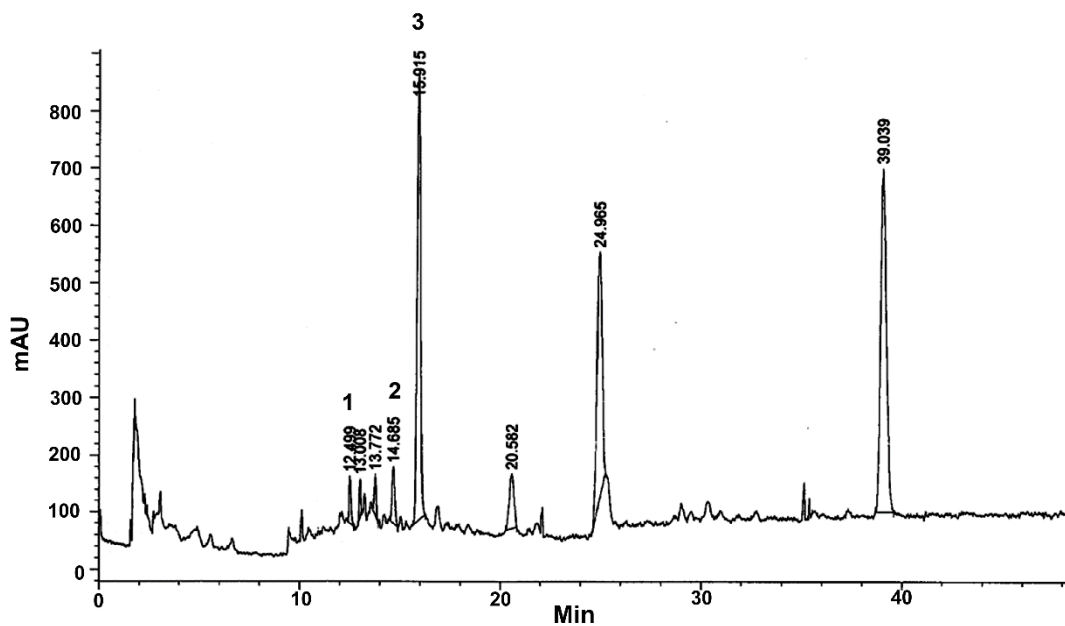

**Figure S3** HPLC chromatogram of polyphenols from black rice extract. Peak: 1 Catechin, 2 Rutin, and 3 Isoquercetin.

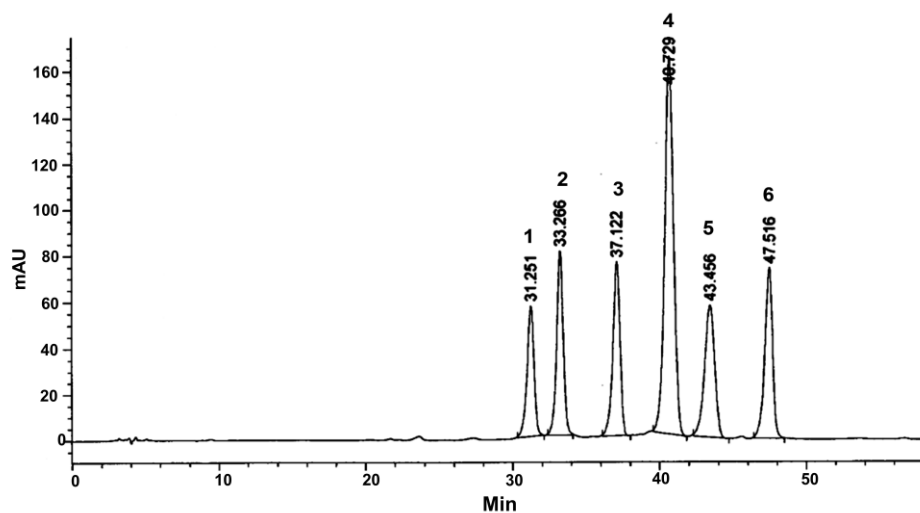

**Figure S4** HPLC chromatogram of standard anthocyanins. Peak: 1 cyanidin 3-glucoside, 2 cyanidin 3-O-rutinoside, 3 Callistephin, 4 Peonidin, 5 Malvidin, and 6 Quercetin.

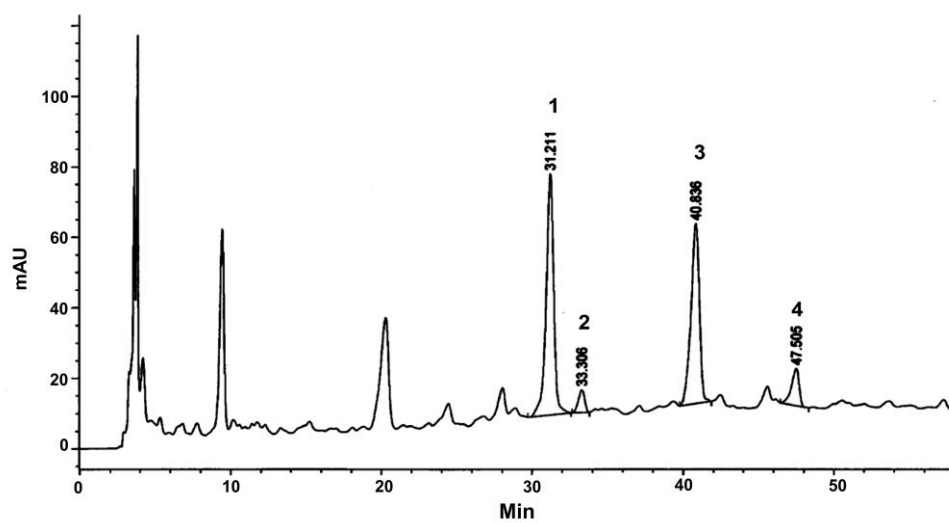

**Figure S5** HPLC chromatogram of anthocyanins from red rice extract. Peak: 1 cyanidin 3-glucoside, 2 cyanidin 3-O-rutinoside, 3 Peonidin, and 4 Quercetin

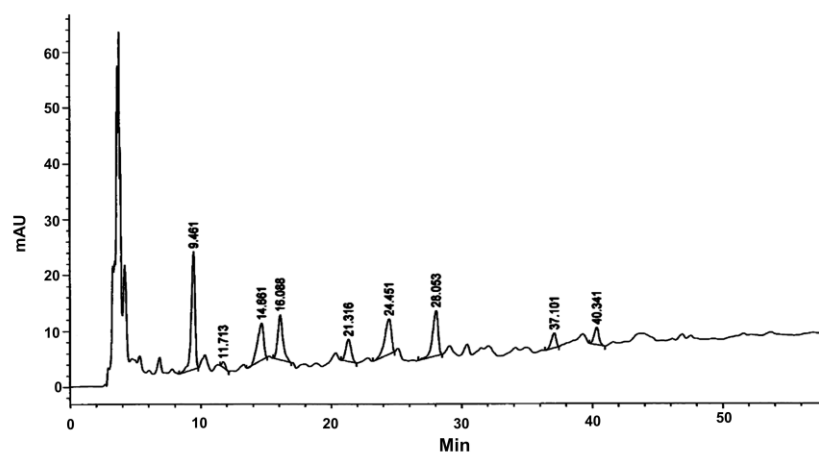

**Figure S6** HPLC chromatogram of anthocyanins from black rice extract.

**Table S1.** Effect of RR and BR on body weight, blood glucose, triglyceride, cholesterol, AST, ALT, BUN and creatinine levels in normal control rats.

| Group                              | D0           | D15         | D30          | D45          |
|------------------------------------|--------------|-------------|--------------|--------------|
| <b>Body weight (g)</b>             |              |             |              |              |
| Normal RR treated group            | 276.25±4.89  | 296.67±3.65 | 335.83±4.80  | 404.17±5.29  |
| Normal BR treated group            | 266.25±3.50  | 291.88±2.98 | 323.13±2.82  | 396.25±4.09  |
| <b>Blood glucose level (mg/dL)</b> |              |             |              |              |
| Normal RR treated group            | 152.37±11.34 | 213.02±6.31 | 207.74±8.25  | 229.52±23.57 |
| Normal BR treated group            | 158.50±8.78  | 208.67±4.15 | 214.48±9.83  | 236.25±31.53 |
| <b>Triglyceride level (mg/dL)</b>  |              |             |              |              |
| Normal RR treated group            | 118.69±2.88  | 121.88±6.55 | 120.25±11.55 | 130.07±3.74  |
| Normal BR treated group            | 110.81±2.02  | 118.44±3.04 | 115.25±2.92  | 121.18±4.43  |
| <b>Cholesterol level (mg/dL)</b>   |              |             |              |              |
| Normal RR treated group            | 156.63±7.67  | 175.00±8.44 | 193.20±6.21  | 191.36±5.08  |
| Normal BR treated group            | 144.75±9.92  | 125.25±7.59 | 155.13±9.34  | 170.39±7.19  |
| <b>AST ((Unit/L)</b>               |              |             |              |              |
| Normal RR treated group            | 59.05±2.98   | 59.23±1.59  | 60.28±1.52   | 62.28±1.13   |
| Normal BR treated group            | 60.84±2.06   | 58.07±5.40  | 68.76±3.52   | 69.58±4.61   |
| <b>ALT (Unit/L)</b>                |              |             |              |              |
| Normal RR treated group            | 54.34±2.06   | 56.79±2.14  | 62.67±3.43   | 71.67±3.46   |
| Normal BR treated group            | 54.53±2.67   | 50.21±3.87  | 64.11±4.51   | 63.71±3.56   |
| <b>BUN (mg/Dl)</b>                 |              |             |              |              |
| Normal RR treated group            | 0.85±0.15    | 0.88±0.19   | 1.02±0.04    | 0.98±0.09    |
| Normal BR treated group            | 0.91±0.07    | 1.13±0.04   | 0.91±0.02    | 0.81±0.04    |
| <b>Creatinine (mg/Dl)</b>          |              |             |              |              |

|                         |            |            |            |            |
|-------------------------|------------|------------|------------|------------|
| Normal RR treated group | 0.382±0.02 | 0.440±0.06 | 0.455±0.03 | 0.492±0.10 |
| Normal BR treated group | 0.331±0.05 | 0.423±0.03 | 0.486±0.02 | 0.538±0.10 |

**Table S2** Effect of RR and BR on MDA, FRAP, GSH in serum and GSH in liver tissue in normal control rats.

| Group                   | MDA<br>(μmol/dL) | FRAP (μmol<br>FeSO4/L) | GSH (nmol<br>GSH/μg<br>protein) in<br>Serum | GSH ( nmol<br>GSH/μg protein)<br>in liver tissue |
|-------------------------|------------------|------------------------|---------------------------------------------|--------------------------------------------------|
| Normal RR treated group | 0.497±0.10       | 1942.92±71.67          | 12.34±1.87                                  | 8.54±0.72                                        |
| Normal BR treated group | 0.495±0.12       | 1849.69±1<br>01.46     | 8.93±1.10                                   | 6.7±2.05                                         |
